1 **Title:**

2 Horizontal gene transfer-mediated bacterial strain variation affects host fitness

3

4 **Running title:**

5 bacterial strain variation and fly fitness

6

7 **Authors:**

8 Yun Wang, Franz Baumdicker, Sven Kuenzel, Fabian Staubach

9

10 **Author affiliations:**

11 Yun Wang, Albert Ludwigs University Freiburg, Biology I, Evolutionary Biology and Ecology,

12 Freiburg, Germany

13 Franz Baumdicker, Cluster of Excellence 'Controlling Microbes to Fight Infections', University of

14 Tübingen, University of Freiburg, Department of Mathematical Stochastics

15 Sven Kuenzel, Max Planck Institute for Evolutionary Biology, Ploen, Germany

16 Fabian Staubach, Albert Ludwigs University Freiburg, Biology I, Evolutionary Biology and

17 Ecology, Freiburg, Germany

18

19 **Corresponding author:**

20 Fabian Staubach, [fabian.staubach@biologie.uni-freiburg.de](mailto:fabian.staubach@biologie.uni-freiburg.de)

21

22

23

24

25

1

## 26 **Abstract**

27 How microbes affect host fitness and environmental adaptation has become a fundamental  
28 research question in evolutionary biology. We tested for associations of bacterial genomic  
29 variation and *Drosophila melanogaster* offspring number in a microbial Genome Wide  
30 Association Study (GWAS). Leveraging strain variation in the genus *Gluconobacter*, a genus of  
31 bacteria that are commonly associated with *Drosophila* under natural conditions, we pinpoint the  
32 thiamine biosynthesis pathway (TBP) as contributing to differences in fitness conferred to the fly  
33 host. By tracing the evolutionary history of TBP genes in *Gluconobacter*, we find that TBP genes  
34 were most likely lost and reacquired by horizontal gene transfer (HGT). We suggest that HGT  
35 might contribute to microbiome flexibility and speculate that it can also more generally contribute  
36 to host adaptation.

37

## 38 **Introduction**

39 Microbes are important drivers of host phenotype and evolution [1]. Benefits derived from  
40 microorganisms can facilitate the occupation of new ecological niches [2–5] and microbial  
41 effects on host phenotypes and fitness can spur adaptive processes [6–14]. Changes in the  
42 effects of microbes on host fitness can alter interactions along the parasitism mutualism  
43 continuum [6, 15–18], thus affecting the evolutionary trajectories of the partners. The importance  
44 of microbes in evolution and health of higher organisms has sparked a search for the molecular  
45 underpinnings of how microbes affect host phenotype.

46 In this search, microbial Genome Wide Association Studies (GWAS) are an important  
47 tool [19–23]. The principle behind a microbial GWAS is to establish a link between traits and  
48 genetic variation of microbes by the means of GWAS. By testing for association between host  
49 traits and microbial genomic variation, Chaston et al. [24] introduced a particularly helpful  
50 approach to unravel how microbes affect host phenotypes [22, 24]. The authors measured host

51 phenotypes, here from *Drosophila melanogaster* that were mono-associated with several  
52 microbial isolates. Differences in host phenotype were then associated with the presence and  
53 absence of genes in the microbial isolates. By applying this approach, it was found that genes  
54 that play a role in glucose oxidation in bacteria affect *D. melanogaster* triglyceride levels [24]  
55 and that bacterial methionine and B vitamins are important for starvation resistance [25] as well  
56 as life span [26].

57 For targeting host phenotypes with microbial GWAS, model systems that allow the  
58 generation of axenic hosts that can successively be associated with individual microbial isolates  
59 are particularly useful [24]. One such model system is *D. melanogaster* and its bacterial  
60 microbiome. Techniques for the generation of gnotobiotic flies are readily available and  
61 standardized measurements of phenotypes exist. Affected phenotypes include the life history  
62 traits development time, fecundity, and life span as well as size of the adults [14, 26–33]. These  
63 traits are directly related to fitness, emphasizing the potential importance of microbes in host  
64 evolution and adaptation. Microbes often affect fitness related traits by provisioning nutrients.  
65 These nutrients include vitamins, amino acids, lipids, and trace elements [24, 34–39]. Nutrient  
66 provisioning is a recurring theme in macrobe–microbe interactions that are adaptive for the host  
67 [40–42].

68 The acquisition of nutrients from microbes need not rely on microbes that live inside the  
69 host. Instead, nutrients can also be acquired by harvesting or preying upon microbes that live  
70 outside the fly and subsequent digestion [35, 43–45]. Furthermore, bacteria have been identified  
71 that affect *D. melanogaster* phenotypes by increasing the ability for nutrient uptake [46] or  
72 metabolizing components of the food substrate, and thus modulating its nutrient content [24].  
73 Interestingly, the metabolic potential to produce nutrients that affect fly fitness differ between  
74 closely related microbes and so do the effects on fly phenotype and fitness [26, 29, 32, 47–51].  
75 These findings contribute to the notion that microbial variation at taxonomically low levels is not

76 only important for human [15], mouse [52], and plant [18] hosts, but also for *Drosophila* [53].

77           Because variation between closely related bacteria is important for the interaction of the  
78 host and its microbiome, it is also important to consider closely related microbes in studies that  
79 aim at elucidating the molecular underpinnings of host-microbe interaction. At the same time,  
80 using the pan-genome of closely related microbes in GWAS might offer particular power to the  
81 approach: on a similar genomic background, microbial genes that affect the host are easier to  
82 identify. For studies that are aimed at better understanding host-microbe interaction in an  
83 evolutionary context, it is also important to consider microbes that are associated with the host  
84 under natural conditions and if possible, to measure evolutionary relevant host phenotypes in a  
85 natural or near natural environment. Finally, tracing the evolutionary changes of the genomic  
86 elements that affect host fitness can help us to gain deeper insights into how host-microbe  
87 interaction evolves.

88           We aimed our study at better understanding whether and how fly fitness is affected by its  
89 natural microbiome by a microbial GWAS. In order to increase the power of the approach and  
90 consider variation at low taxonomic levels, we concentrated on variation within a taxonomically  
91 restricted group of bacteria. Therefore, we focused our study on *Gluconobacter*, a bacterial  
92 genus that is commonly associated with *D. melanogaster* under natural conditions [54–57]. We  
93 assessed fitness parameters on grape juice based fly food as a near natural food source. In  
94 order to better understand how microbial effects on host fitness evolve, we traced the  
95 evolutionary events that lead to changes in bacteria-mediated host fitness.

96

## 97 **Materials and Methods**

### 98 Fitness assays

99 Canton-S stocks were kept at 25 °C on food prepared following the Bloomington *Drosophila*  
100 Stock Center 'Cornmeal Molasses and Yeast Medium' (532 ml water, 40 ml molasses, 6.6 g

101 yeast. 32.6 g cornmeal, 3.2 g agar, 2.2 ml propionic acid and 7.6 ml Tegosept). To generate  
102 axenic flies, embryos were collected and washed in PBS, dechorionated in 50% bleach for 2-3  
103 mins, and rinsed in sterile PBS for 1 min. Embryos were placed in sterilized food bottles under a  
104 sterile workbench and maintained at 25 °C under a 12:12 light cycle in axenic condition for 3  
105 weeks during which the flies had time to hatch and mate. One axenic female from these bottles  
106 was used per vial in the fitness assay. For the fitness assay, bacterial cultures were grown in  
107 liquid YPD medium for 48-72 hours and normalized to the same optical density ( $OD_{600} = 0.6$ ).  
108 150  $\mu$ l of OD normalized medium were added directly on 10ml sterile grape juice food (667 ml  
109 water, 333 ml Jacoby white grape juice, 8 g yeast, 50 g cornmeal, 10 g agar, 3 ml propionic  
110 acid). Axenic females were transferred to the vial immediately afterwards. We prepared two  
111 control treatments. First, we added sterile YPD medium to the food as axenic control. Second,  
112 we used conventionally reared flies homogenized in YPD as inoculum. We tracked the number  
113 of pupae per vial for 16 consecutive days after infection. On the last day, flies were counted,  
114 collected and weighed. All offspring were weighed together in one Eppendorf tube for each  
115 replicate and weight per fly was calculated. All fitness related measurements were done blind.  
116 That means the vials were given random numbers and only after the measurements were taken,  
117 the bacterial strain ID was connected to the result. For the thiamine supplement experiment, we  
118 added 1  $\mu$ g/ml thiamine to the food described above. That concentration has proven effective for  
119 phenotypic rescue in [37]. All statistical analyses were performed in R and can be found in  
120 supplementary script S1.

121

#### 122 Bacterial loads and contamination control

123 Fly offspring from the fitness assays were stored in PBS/glycerol mixture at -80 °C for later  
124 contamination control and the counting of colony forming units (CFUs). 3-6 replicates per  
125 bacterial isolate were picked for CFU counting. For CFU counting, samples of 3 to 5 offspring

126 were homogenized with a pestle in 300  $\mu$ l of PBS. The homogenates were plated on YPD agar  
127 medium. Plates were incubated for 48 hours. CFU counts were done visually or with the  
128 OpenCFU software [58], Table S4). Plates for CFU counting were also inspected for colony  
129 morphology and colony color that could indicate potential contamination, with negative results.  
130 All homogenates were plated on antibiotic YPD agar medium (with 100  $\mu$ g/ml kanamycin or  
131 ampicillin) for assessing yeast contamination. No yeast colonies were observed except in the  
132 control replicates in which conventional lab microbiota were used. To further assess potential  
133 bacterial contaminants during our experiment, we quantified the relative abundance of target  
134 isolates on fly offspring using 16S rRNA gene sequencing. In short, DNA was extracted from  
135 pools of 3-5 offspring for 3-6 replicates per bacterial isolate after the experiment, including the  
136 replicates with the highest and lowest offspring number. The V4 regions of the bacterial 16S  
137 rRNA gene were amplified and sequenced on an illumina MiSeq sequencer following [56, 59].  
138 Sequencing data were analyzed using mothur [60] (See supplementary script S2 for all  
139 commands executed). The relative abundance of target 16S rRNA gene sequences for mono-  
140 associated isolates was calculated. The average relative abundance of target 16S sequences  
141 was over 88% (Figure S8A) in the initial experiment. Only in (6 out of 66) replicates the relative  
142 abundance was below 75%, including 3 cases of *P. sneebia* that showed very low bacterial  
143 loads. For the thiamine treatment the target bacteria were significantly enriched in the microbial  
144 community (Figure S8B).

145

#### 146 Bacterial isolates, genome sequencing and assembly:

147 We sequenced, assembled, and annotated draft genomes of eleven bacteria and added  
148 genome data for six bacteria from public databases (Table S1). Nine strains were isolated from  
149 wild-caught *Drosophila* collected in the San Francisco Bay Area (California, USA). Isolates were  
150 cultured in YPD for standard phenol-chloroform DNA extraction. Bacterial genomes were

151 sequenced using Illumina MiSeq technology and assembled with the A5 MiSeq assembler [61].  
152 Completeness and contamination were assessed with checkM v1.1.2 [62], using standard  
153 settings. Assembly statistics were generated with QUAST v5.0.2 [63]. Annotation was performed  
154 with prokka v1.1 [64] or imported from GenBank. Average nucleotide identity (ANI) was  
155 computed with fastANI (v0.1.2). New isolates were taxonomically classified, using GTDBtk  
156 (v0.1.4) [65]. FastANI and GTDBtk were run on the kbase web interface [66].

157

### 158 Pan-genome clustering and phylogenetic trees

159 Genomes were analyzed using the panX analysis pipeline [60] with standard parameters (script  
160 S3). Genes were grouped into 11269 clusters of homologous sequences, including clusters with  
161 a single gene. Thereby the presence and absence of each gene cluster in the 17 genomes was  
162 estimated. Based on the alignments of all single-copy genes that are present in all 17 genomes,  
163 panX reconstructs a phylogenetic tree. For the phylogeny, FastTree 2 [67] and RaxML [68] are  
164 applied to all variable positions from these alignments. For the phylogeny of thiE, nucleotide  
165 sequences were aligned using MUSCLE v3.8.425 [99] and the tree was built using MrBayes  
166 3.2.6 [70] as incorporated in the Geneious software suit v1.1 (Biomatters Ltd.).

167

### 168 Microbial pan-genome-wide association study

169 We calculated the gene presence absence association score (PA score) between each  
170 predicted cluster of homologous genes and fly offspring number. I.e. if  $D_g$  is the difference  
171 between the mean fly offspring for strains with and without gene  $g$ ,  $\sigma$  is the standard deviation of  
172 fly offspring and  $n_g$  is the number gene gains and losses as inferred from the phylogeny. The

173 association score is given by  $\sqrt{n_g} \frac{D_g}{\sigma}$ . Three alternative association scores from treeWAS [21]

174 and the corresponding model based p-values were calculated. Association scores based on the  
175 presence and absence of genes are prone to false positives because genome wide linkage  
176 results in strongly correlated presence and absence of genes. Panx and treeWAS reduce this  
177 effect by taking the reconstructed ancestral gene gain and loss events into account.

178

## 179 **Results**

180 We performed a microbial GWAS for the number of offspring produced by females that were  
181 mono-associated with 17 bacterial isolates from genera that co-occur with *Drosophila*  
182 *melanogaster* in its natural environment. *Gluconobacter* was represented by 13 isolates. Two  
183 additional isolates were from the genus *Acetobacter*. Species from this genus can benefit  
184 *Drosophila* development [28]. One isolate was *Commensalibacter intestini* that might have a  
185 probiotic function in *D. melanogaster* [71] and is enriched in flies over substrate in wild-caught  
186 flies [57]. As an outgroup and to get a baseline for the fitness effect of an ingested pathogen, we  
187 added *Providencia sneebia*, that is highly pathogenic when entering the hemolymph [72]. All  
188 bacterial genomes analyzed were >99% complete with the exception of *P. sneebia* (>96%, Table  
189 S1). The mean number of offspring varied significantly between flies mono-associated with  
190 different isolates ( $P = 4.2 \times 10^{-15}$ , Kruskal-Wallis-Test, Figure 1A) up to a 2.8-fold difference  
191 between *Gluconobacter morbifer* and *Gluconobacter sp.* P5H9d. Differences between bacterial  
192 strains also explained a significant proportion of variation in offspring number when we  
193 accounted for bacterial loads per fly ( $P = 1.4 \times 10^{-4}$ , linear model), suggesting that not only  
194 bacterial biomass affects fly fitness. Presence-absence patterns of 11269 genes were tested  
195 for association with the number of offspring that mono-associated females produced using the  
196 PA method [73]. Associations were confirmed by permutation tests and TreeWAS [21] (Figure  
197 S1, Table 1, Table S2). The six highest PA scores depended strongly on presence-absence  
198 patterns between the closely related strains P1C6b, DSM2003, DSM2343, and DSM3504



199 (mean ANI = 95.5%) in the branch that includes *G. morbifer* (Figure S1 and accompanying text).

200

201 The bacterial thiamine biosynthesis pathway is associated with increased offspring number

202 Five of the six bacterial genes that were most strongly associated with offspring number were  
203 part of the thiamine biosynthesis pathway (TBP, Table 1). Females reared on bacteria carrying a  
204 complete TBP (TBP+) produced more offspring ( $P = 0.0038$ , Mann-Whitney-Test on strain  
205 medians,  $n = 17$ , Figure 1A), suggesting that bacterial thiamine production might increase the  
206 number of offspring.

207 Because high numbers of *Drosophila* offspring on a confined resource like a *Drosophila*  
208 vial can lead to crowding effects including smaller adults and reduced individual fitness, we  
209 weighed the adult flies at the end of the experiment. Weight did not differ significantly between  
210 the offspring of females reared on TBP+ and TBP- strains ( $P = 0.55$ , Mann-Whitney-Test on  
211 strain medians,  $n = 17$ , Figure S2), providing no evidence for larval crowding or reduced adult  
212 size.

213 The increase in the number of adult offspring for females reared on TBP+ strains could  
214 result from a shortened development time or an increased number of eggs laid by the females.  
215 Due to the lack of evidence that bacterial thiamine increases egg laying [37], we expected that  
216 time to puparium formation would be shorter for flies associated with TBP+ bacteria. Indeed,  
217 pupariation time was significantly reduced for offspring of females reared on TBP+ strains ( $P =$   
218  $0.015$ , Mann-Whitney-Test on strain medians,  $n = 17$ , Figure S3). Significance of all p-values  
219 was confirmed in a linear model framework that accounts for bacterial load and also in a  
220 phylogenetic ANOVA (Script S1).

221 In order to further explore a potential role of thiamine in increasing fly offspring number,  
222 we supplemented the diet of females that were mono-associated with seven bacterial strains  
223 (*G. oxydans* DSM2343, *G. oxydans* DSM2003, *G. sp.* DSM3504, *G. sp.* P1C6\_b, *G. cerevisiae*

224 DSM27644, *G. morbifer* G707 and *C. intestini* A911) with thiamine. This setup covered the *G.*  
225 *morbifer* branch of the phylogeny and all acetic acid bacteria that are missing key enzymes of  
226 the TBP (TBP-). The relative number of offspring for the three TBP- strains increased under  
227 thiamine treatment ( $P = 0.025$ , linear mixed effects model, Figure 1B), supporting a role of  
228 bacterial thiamine production in the number of offspring that flies produced. Furthermore, with  
229 thiamine added, neither average offspring weight nor the time to pupariation differed between  
230 TBP+ and TBP- associated flies ( $P = 1$  both cases, Mann-Whitney-Test on strain medians,  $n =$   
231 7, Figure S4).

232

233 Thiamine biosynthesis genes were most likely lost and reacquired by horizontal gene transfer as  
234 an operon on the branch that includes *G. morbifer*

235 In order to better understand the evolutionary history of the TBP (Figure 2A) in *Gluconobacter*,  
236 we analyzed the synteny of the underlying loci in a phylogenetic framework. The strains in the  
237 upper two panels of Figure 2B possess all genes required for thiamine biosynthesis. A closer  
238 inspection of TBP genes on the *G. morbifer* branch (II in Figure 2C) revealed that two strains  
239 are TBP-, while the four other strains are TBP+. Inspection of the TBP gene loci revealed that all  
240 strains on branch II are missing the operon like structure thiOSG (Figure 2C) at the locus that is  
241 syntenic with branch I. The same pattern was found for thiC and thiD (Figure S5). thiOSG  
242 (Figure 2C), thiC, and thiD (Figure S6) are present in the closely related bacteria *Gluconobacter*  
243 *samuiensis* and *Neokomagataea tanensis* at syntenic loci, suggesting deletion on branch II. The  
244 strains with an intact operon on branch II carried a TBP operon at different loci (Figure 2D),  
245 suggesting insertion.

246 Analyzing the sequences of the inserted genes in a phylogenetic framework, we found  
247 that the inserted genes form a distant clade. For example thiE1, the copy that remained at the  
248 locus shown in Figure 2C, followed the phylogeny based on the core genome, while the

249 potentially newly acquired copy thiE2 that is part of the operon thiCOSGEFD formed a distant  
250 clade (Figure 2E), supporting HGT. Within this clade, the phylogeny of thiE2 is again congruent  
251 with the core genome phylogeny, consistent with a single reacquisition event of thiCOSGEFD.  
252 The same phylogenetic patterns were found for the other TBP genes that were shared across  
253 branches (thiCOSGD, Figure S7), further supporting a single HGT of thiCOSGEFD to the *G.*  
254 *morbifer* branch. Because TBP genes can occur on plasmids [74], we blast searched the  
255 plasmids of the strains for which the plasmids were resolved for TBP genes, finding no evidence  
256 for TBP genes (data not shown). In order to identify a potential donor of the operon, we blast  
257 searched the sequence of the entire operon against the ncbi non-redundant nucleotide  
258 database (nr). The best matching non-*Gluconobacter* sequences were from Rhodobacteraceae,  
259 a phylogenetically distant bacterial family (Table S3). A single reacquisition event of the  
260 essential TBP genes, as suggested by the concordance of the inserted operon with the core  
261 gene phylogeny, implies that the TBP- strain DSM3504 lost the operon again in an independent  
262 event, as depicted in Figure 2D (left).

263

## 264 **Discussion**

### 265 Microbial GWAS for host traits can benefit from strain level variation

266 We applied a microbial GWAS approach that associates bacterial genes with host phenotype  
267 focusing on the genus *Gluconobacter*. Microbial GWAS approaches can be particularly  
268 powerful, when pan-genomic variation of closely related bacterial strains can be leveraged, as  
269 has been shown for e.g. virulence genes [75]. We showed that genetic variation between the  
270 strains P1C6b, DSM2003, DSM2343, and DSM3504 (mean ANI = 95.5%) empowered us to  
271 pinpoint the TBP (Figure S1). Variation between bacteria that have ANI > 95% is considered  
272 strain level variation [76]. The only gene that had a higher association score for offspring  
273 number than the TBP genes was a transposase. Transposases more frequently produce rare

274 presence-absence patterns because they are mobile and not linked as strongly to the rest of the  
275 genome as are non-mobile genetic elements. Therefore, we suspect that the high association  
276 score is an artefact of its mobility although we can not exclude an effect of the transposon on  
277 the number of fly offspring.

278

#### 279 Variation between closely related microbes is important for host phenotypes

280 We observed significant variation of phenotypes between flies that were associated with closely  
281 related microbial strains. This supports the notion that strain level variation is important to  
282 consider when studying host-microbe interaction in animals, humans, and plants alike (e.g. [15,  
283 18, 52, 77, 78]). In particular, in *D. melanogaster* evidence for the importance of variation  
284 between closely related bacteria is accumulating for life history of the host [26, 29, 47–51, 79].  
285 Unawareness of strain level variation in bacterial effects on the host might have led to perceived  
286 inconsistency between studies [53].

287

#### 288 Loss of the TBP and regain by HGT in the context of the evolution of host-microbe interaction

289 Fly fitness was strongly associated with genes from the TBP. In [37], thiamine produced by  
290 *Acetobacter pomorum* is sufficient to rescue the development of *D. melanogaster* on a thiamine  
291 free diet. Furthermore, the authors found that thiamine affects development, but not egg laying  
292 nor longevity. This is consistent with our result that flies raised on TBP- strains took longer to  
293 develop into pupae (Figure S3). The acquisition of B vitamins like thiamine (B1) is a typical  
294 benefit that insects receive from microbes [25, 80] and falls into the greater context of nutrient  
295 provisioning by microbes, which is a recurring theme in the evolution of host-microbe interaction  
296 [40, 41].

297 By tracing the genes of the TBP across genomes and the phylogeny, we found that the

298 pathway to produce Thiamine-P was regained most likely via HGT (Figure 2D). As such, our  
299 study exemplifies that individual events of HGT into a host-associated microbe can alter host  
300 fitness outcomes. Other studies that show an effect on host fitness via HGT to a host-associated  
301 microbe involve defensive compounds produced by microbial symbionts in plants [81] and  
302 animals [17, 82]. In our study, the increase in host fitness with the reacquisition of the TBP is  
303 most likely mediated via nutritional benefits. Only a few similar cases have been described so  
304 far. The most prominent may be the acquisition of vitamin B7 (biotin) synthesis by bed bug-  
305 associated *Wolbachia* [83]. Similarly, cat flea-associated *Wolbachia* seem to have gained the  
306 ability to produce biotin via HGT from closely related strains [84]. In ticks, *pabA* (and possibly  
307 *pabB*) required for the synthesis of folic acid, was acquired by a *Coxiella* like symbiont through  
308 horizontal gene transfer (HGT) from an Alphaproteobacterium [85] and is thought to affect tick  
309 fitness.

310 A difference between our- and these previous studies is that although *Gluconobacter* is  
311 frequently associated with *D. melanogaster* under natural conditions [54–57], it is neither an  
312 obligate symbiont nor is it restricted to the fly gut. Given occurrence in the environment and the  
313 opportunity for horizontal transfer of the bacterium between hosts, there is currently no evidence  
314 that the fly host significantly affects *Gluconobacter* evolution. Further, taking into account  
315 evidence that the abundance of mobile metabolic genes is governed by selection [86, 87], we  
316 must assume that loss and gain of the TBP must first of all benefit the bacterium to persist in the  
317 bacterial genome. Thiamine is considered essential for bacteria [88], and thus the TBP can only  
318 be lost if enough thiamine is available in the environment. Fruit, the main food substrate of  
319 *Drosophila* under natural conditions [89] and the basis for the food used in our study, is mostly  
320 poor in thiamine [90]. However, other bacteria that are associated with *Drosophila*, for example  
321 other strains of *Gluconobacter* (this study), *Acetobacter pomorum* or *Lactobacillus plantarum*,  
322 can produce thiamine [37, 39]. Under these conditions, it might be beneficial for a community

323 member to lose TBP as a result of selection for reduced metabolic expenditure [91]. This is  
324 consistent with TBP dependent fitness effects on the host being a byproduct of selection on  
325 thiamine production in the microbe.

326         Our study suggests that HGT to host associated-microbes could quickly increase host  
327 fitness. An increase in microbe mediated host fitness should also increase selection pressure on  
328 the host to favor that particular microbe that provides an increased benefit [41, 92, 93].  
329 Waterworth et al. [94] suggested that the acquisition of genes to produce a defensive compound  
330 via HGT was key to the domestication of a bacterial defensive symbiont in beetles. We  
331 speculate that similar scenarios might be plausible for nutritional benefits in *Drosophila* because  
332 (i) mechanisms of host selection work efficiently for environmentally acquired bacteria [95–98],  
333 (ii) stable, strain specific associations of *Drosophila* with mutualistic bacteria have been reported  
334 [50], and (iii) evidence for host selection in the fly is accumulating in the laboratory [45, 99] as  
335 well as under natural conditions [55, 57]. Because the result of HGT here provides a potential  
336 benefit to the host under thiamine poor conditions that are often encountered under natural  
337 conditions e.g. on thiamine poor fruit, our study contributes to a broader view of adaptation that  
338 can involve a flexible microbiome [4, 100].

339

#### 340 **Data availability**

341 Raw sequence data for the bacterial genomes, the assemblies used in this study, and the 16S  
342 rRNA gene sequences will be available under PRJNA656529

343

#### 344 **Acknowledgements**

345 We thank Ruth Hershberg (Technion, Haifa, Israel), Christian Voolstra (Uni Konstanz,  
346 Germany), Lena Waidele (Uni Freiburg, Freiburg, Germany), and John Baines (MPI for  
347 Evolutionary Biology, Ploen, Germany) for helpful comments on the manuscript. This work was

348 funded by the DFG (STA1154/4-1; Projektnummer 408908608 and BA5529/1-1; Projektnummer  
349 405974812). The authors acknowledge support by the state of Baden-Württemberg through  
350 bwHPC.

351

## 352 **Competing interest**

353 The authors declare no competing interests.

354

## 355 **References**

- 356 1. McFall-Ngai M, Hadfield MG, Bosch TCG, Carey HV, Domazet-Lošo T, Douglas AE, et al.  
357 Animals in a bacterial world, a new imperative for the life sciences. *PNAS* 2013; **110**:  
358 3229–3236.
- 359 2. Douglas AE. Nutritional interactions in insect-microbial symbioses: aphids and their  
360 symbiotic bacteria *Buchnera*. *Annual Review of Entomology* 1998; **43**: 17–37.
- 361 3. Moran NA. Symbiosis as an adaptive process and source of phenotypic complexity.  
362 *Proceedings of the National Academy of Sciences* 2007; **104**: 8627–8633.
- 363 4. Bang C, Dagan T, Deines P, Dubilier N, Duschl WJ, Fraune S, et al. Metaorganisms in  
364 extreme environments: do microbes play a role in organismal adaptation? *Zoology* 2018;  
365 **127**: 1–19.
- 366 5. Salem H, Kirsch R, Pauchet Y, Berasategui A, Fukumori K, Moriyama M, et al. Symbiont  
367 digestive range reflects host plant breadth in herbivorous beetles. *Current Biology* 2020;  
368 30: 2875-2886.e4.
- 369 6. Jaenike J, Unckless R, Cockburn SN, Boelio LM, Perlman SJ. Adaptation via symbiosis:  
370 recent spread of a *Drosophila* defensive symbiont. *Science* 2010; **329**: 212–215.
- 371 7. Himler AG, Adachi-Hagimori T, Bergen JE, Kozuch A, Kelly SE, Tabashnik BE, et al.  
372 Rapid spread of a bacterial symbiont in an invasive whitefly is driven by fitness benefits

- 373 and female bias. *Science* 2011; **332**: 254–256.
- 374 8. Bordenstein SR, Theis KR. Host biology in light of the microbiome: ten principles of  
375 holobionts and hologenomes. *PLOS Biology* 2015; **13**: e1002226.
- 376 9. Moran NA, Yun Y. Experimental replacement of an obligate insect symbiont. *Proceedings*  
377 *of the National Academy of Sciences* 2015; **112**: 2093–2096.
- 378 10. Waidele L, Korb J, Voolstra CR, Künzel S, Dedeine F, Staubach F. Differential ecological  
379 specificity of protist and bacterial microbiomes across a set of termite species. *Front*  
380 *Microbiol* 2017; **8**.
- 381 11. Waidele L, Korb J, Voolstra CR, Dedeine F, Staubach F. Ecological specificity of the  
382 metagenome in a set of lower termite species supports contribution of the microbiome to  
383 adaptation of the host. *Animal Microbiome* 2019; **1**: 13.
- 384 12. Behrman EL, Howick VM, Kapun M, Staubach F, Bergland AO, Petrov DA, et al. Rapid  
385 seasonal evolution in innate immunity of wild *Drosophila melanogaster*. *Proc R Soc B*  
386 2018; **285**: 20172599.
- 387 13. Rudman SM, Greenblum S, Hughes RC, Rajpurohit S, Kiratli O, Lowder DB, et al.  
388 Microbiome composition shapes rapid genomic adaptation of *Drosophila melanogaster*.  
389 *PNAS* 2019; **116**: 20025–20032.
- 390 14. Walters AW, Hughes RC, Call TB, Walker CJ, Wilcox H, Petersen SC, et al. The  
391 microbiota influences the *Drosophila melanogaster* life history strategy. *Molecular*  
392 *Ecology* 2020; **29**: 639–653.
- 393 15. Frank C, Werber D, Cramer JP, Askar M, Faber M, an der Heiden M, et al. Epidemic  
394 profile of shiga-toxin–producing *Escherichia coli* O104:H4 outbreak in Germany. *New*  
395 *England Journal of Medicine* 2011; **365**: 1771–1780.
- 396 16. Sachs JL, Skophammer RG, Bansal N, Stajich JE. Evolutionary origins and diversification  
397 of proteobacterial mutualists. *Proceedings of the Royal Society of London B: Biological*



- 398 *Sciences* 2014; **281**: 20132146.
- 399 17. Flórez LV, Scherlach K, Miller IJ, Rodrigues A, Kwan JC, Hertweck C, et al. An antifungal  
400 polyketide associated with horizontally acquired genes supports symbiont-mediated  
401 defense in *Lagria villosa* beetles. *Nat Commun* 2018; **9**: 1–10.
- 402 18. Melnyk RA, Hossain SS, Haney CH. Convergent gain and loss of genomic islands drive  
403 lifestyle changes in plant-associated *Pseudomonas*. *The ISME Journal* 2019; **13**: 1575–  
404 1588.
- 405 19. Sheppard SK, Didelot X, Meric G, Torralbo A, Jolley KA, Kelly DJ, et al. Genome-wide  
406 association study identifies vitamin B5 biosynthesis as a host specificity factor in  
407 *Campylobacter*. *PNAS* 2013; **110**: 11923–11927.
- 408 20. Brynildsrud O, Bohlin J, Scheffer L, Eldholm V. Rapid scoring of genes in microbial pan-  
409 genome-wide association studies with Scoary. *Genome Biol* 2016; **17**: 238.
- 410 21. Collins C, Didelot X. A phylogenetic method to perform genome-wide association studies  
411 in microbes that accounts for population structure and recombination. *PLOS*  
412 *Computational Biology* 2018; **14**: e1005958.
- 413 22. Sexton CE, Smith HZ, Newell PD, Douglas AE, Chaston JM. MAGNAMWAR: an R  
414 package for genome-wide association studies of bacterial orthologs. *Bioinformatics* 2018;  
415 **34**: 1951–1952.
- 416 23. White KM, Matthews MK, Hughes RC, Sommer AJ, Griffiths JS, Newell PD, et al. A  
417 Metagenome-wide association study and arrayed mutant library confirm *Acetobacter*  
418 lipopolysaccharide genes are necessary for association with *Drosophila melanogaster*.  
419 *G3 (Bethesda)* 2018; **8**: 1119–1127.
- 420 24. Chaston JM, Newell PD, Douglas AE. Metagenome-wide association of microbial  
421 determinants of host phenotype in *Drosophila melanogaster*. *mBio* 2014; **5**: e01631-14.
- 422 25. Judd AM, Matthews MK, Hughes R, Veloz M, Sexton CE, Chaston JM. Bacterial

- 423 methionine metabolism genes influence *Drosophila melanogaster* starvation resistance.  
424 *Appl Environ Microbiol* 2018; **84**.
- 425 26. Matthews MK, Wilcox H, Hughes R, Veloz M, Hammer A, Banks B, et al. genetic  
426 influences of the microbiota on the life span of *Drosophila melanogaster*. *Appl Environ*  
427 *Microbiol* 2020; **86**.
- 428 27. Brummel T, Ching A, Seroude L, Simon AF, Benzer S. *Drosophila* lifespan enhancement  
429 by exogenous bacteria. *Proceedings of the National Academy of Sciences of the United*  
430 *States of America* 2004; **101**: 12974–12979.
- 431 28. Shin SC, Kim S-H, You H, Kim B, Kim AC, Lee K-A, et al. *Drosophila* microbiome  
432 modulates host developmental and metabolic homeostasis via insulin signaling. *Science*  
433 2011; **334**: 670–674.
- 434 29. Storelli G, Defaye A, Erkosar B, Hols P, Royet J, Leulier F. *Lactobacillus plantarum*  
435 promotes *Drosophila* systemic growth by modulating hormonal signals through tor-  
436 dependent nutrient sensing. *Cell Metabolism* 2011; **14**: 403–414.
- 437 30. Téfrit MA, Leulier F. *Lactobacillus plantarum* favors the early emergence of fit and fertile  
438 adult *Drosophila* upon chronic undernutrition. *Journal of Experimental Biology* 2017;  
439 jeb.151522.
- 440 31. Fast D, Duggal A, Foley E. Monoassociation with *Lactobacillus plantarum* disrupts  
441 intestinal homeostasis in adult *Drosophila melanogaster*. *mBio* 2018; **9**: e01114-18.
- 442 32. Gould AL, Zhang V, Lamberti L, Jones EW, Obadia B, Korasidis N, et al. Microbiome  
443 interactions shape host fitness. *PNAS* 2018; 201809349.
- 444 33. Obata F, Fons CO, Gould AP. Early-life exposure to low-dose oxidants can increase  
445 longevity via microbiome remodelling in *Drosophila*. *Nat Commun* 2018; **9**: 975.
- 446 34. Dobson AJ, Chaston JM, Newell PD, Donahue L, Hermann SL, Sannino DR, et al. Host  
447 genetic determinants of microbiota-dependent nutrition revealed by genome-wide

- 448 analysis of *Drosophila melanogaster*. *Nat Commun* 2015; **6**: 6312.
- 449 35. Yamada R, Deshpande SA, Bruce KD, Mak EM, Ja WW. Microbes promote amino acid  
450 harvest to rescue undernutrition in *Drosophila*. *Cell Reports* 2015; **10**: 865–872.
- 451 36. Chaston JM, Dobson AJ, Newell PD, Douglas AE. Host genetic control of the microbiota  
452 mediates the *Drosophila* nutritional phenotype. *Appl Environ Microbiol* 2016; **82**: 671–  
453 679.
- 454 37. Sannino DR, Dobson AJ, Edwards K, Angert ER, Buchon N. The *Drosophila*  
455 *melanogaster* gut microbiota provisions thiamine to its host. *mBio* 2018; **9**: e00155-18.
- 456 38. Henriques SF, Dhakan DB, Serra L, Francisco AP, Carvalho-Santos Z, Baltazar C, et al.  
457 Metabolic cross-feeding in imbalanced diets allows gut microbes to improve reproduction  
458 and alter host behaviour. *Nat Commun* 2020; **11**: 1–15.
- 459 39. Consuegra J, Grenier T, Baa-Puyoulet P, Rahioui I, Akherraz H, Gervais H, et al.  
460 *Drosophila*-associated bacteria differentially shape the nutritional requirements of their  
461 host during juvenile growth. *PLOS Biology* 2020; **18**: e3000681.
- 462 40. Ankrah NYD, Douglas AE. Nutrient factories: metabolic function of beneficial  
463 microorganisms associated with insects. *Environmental Microbiology* 2018; **20**: 2002–  
464 2011.
- 465 41. Moran NA, Ochman H, Hammer TJ. Evolutionary and ecological consequences of gut  
466 microbial communities. *Annual Review of Ecology, Evolution, and Systematics* 2019; **50**:  
467 451–475.
- 468 42. Johnson EL, Heaver SL, Waters JL, Kim BI, Bretin A, Goodman AL, et al. Sphingolipids  
469 produced by gut bacteria enter host metabolic pathways impacting ceramide levels.  
470 *Nature Communications* 2020; **11**: 2471.
- 471 43. Inamine H, Ellner SP, Newell PD, Luo Y, Buchon N, Douglas AE. Spatiotemporally  
472 heterogeneous population dynamics of gut bacteria inferred from fecal time series data.

- 473 *mBio* 2018; **9**: e01453-17.
- 474 44. Keebaugh ES, Yamada R, Obadia B, Ludington WB, Ja WW. Microbial quantity impacts  
475 *Drosophila* nutrition, development, and lifespan. *iScience* 2018; **4**: 247–259.
- 476 45. Storelli G, Strigini M, Grenier T, Bozonnet L, Schwarzer M, Daniel C, et al. *Drosophila*  
477 perpetuates nutritional mutualism by promoting the fitness of its intestinal symbiont  
478 *Lactobacillus plantarum*. *Cell Metabolism* 2018; **27**: 362-377.e8.
- 479 46. Matos RC, Schwarzer M, Gervais H, Courtin P, Joncour P, Gillet B, et al. D-Alanylation of  
480 teichoic acids contributes to *Lactobacillus plantarum*-mediated *Drosophila* growth during  
481 chronic undernutrition. *Nature Microbiology* 2017; **2**: 1635–1647.
- 482 47. Newell PD, Douglas AE. Interspecies interactions determine the impact of the gut  
483 microbiota on nutrient allocation in *Drosophila melanogaster*. *Appl Environ Microbiol*  
484 2014; **80**: 788–796.
- 485 48. Newell PD, Chaston JM, Wang Y, Winans NJ, Sannino DR, Wong ACN, et al. In vivo  
486 function and comparative genomic analyses of the *Drosophila* gut microbiota identify  
487 candidate symbiosis factors. *Front Microbiol* 2014; **5**.
- 488 49. Winans NJ, Walter A, Chouaia B, Chaston JM, Douglas AE, Newell PD. A genomic  
489 investigation of ecological differentiation between free-living and *Drosophila*-associated  
490 bacteria. *Mol Ecol* 2017; **26**: 4536–4550.
- 491 50. Pais IS, Valente RS, Sporniak M, Teixeira L. *Drosophila melanogaster* establishes a  
492 species-specific mutualistic interaction with stable gut-colonizing bacteria. *PLOS Biology*  
493 2018; **16**: e2005710.
- 494 51. Lee J, Han G, Kim JW, Jeon CO, Hyun S. Taxon-specific effects of *Lactobacillus* on  
495 *Drosophila* host development. *Microb Ecol* 2020; **79**: 241–251.
- 496 52. Schwarzer M, Makki K, Storelli G, Machuca-Gayet I, Srutkova D, Hermanova P, et al.  
497 *Lactobacillus plantarum* strain maintains growth of infant mice during chronic

- 498           undernutrition. *Science* 2016; **351**: 854–857.
- 499   53.   Douglas AE. Contradictory results in microbiome science exemplified by recent  
500           *Drosophila* research. *mBio* 2018; **9**: e01758-18.
- 501   54.   Staubach F, Baines JF, Künzel S, Bik EM, Petrov DA. Host species and environmental  
502           effects on bacterial communities associated with *Drosophila* in the laboratory and in the  
503           natural environment. *PLoS ONE* 2013; **8**: e70749.
- 504   55.   Adair KL, Wilson M, Bost A, Douglas AE. Microbial community assembly in wild  
505           populations of the fruit fly *Drosophila melanogaster*. *The ISME Journal* 2018; **1**.
- 506   56.   Wang Y, Staubach F. Individual variation of natural *D. melanogaster*-associated bacterial  
507           communities. *FEMS Microbiol Lett* 2018; **365**.
- 508   57.   Wang Y, Kapun M, Waidele L, Kuenzel S, Bergland AO, Staubach F. Common structuring  
509           principles of the *Drosophila melanogaster* microbiome on a continental scale and  
510           between host and substrate. *Environmental Microbiology Reports* 2020; **12**: 220–228.
- 511   58.   Geissmann Q. OpenCFU, a new free and open-source software to count cell colonies  
512           and other circular objects. *PLoS One* 2013; **8**.
- 513   59.   Kozich JJ, Westcott SL, Baxter NT, Highlander SK, Schloss PD. Development of a dual-  
514           index sequencing strategy and curation pipeline for analyzing amplicon sequence data on  
515           the MiSeq Illumina sequencing platform. *Appl Environ Microbiol* 2013; **79**: 5112–5120.
- 516   60.   Schloss PD, Westcott SL, Ryabin T, Hall JR, Hartmann M, Hollister EB, et al. Introducing  
517           mothur: open-source, platform-independent, community-supported software for  
518           describing and comparing microbial communities. *Applied and Environmental*  
519           *Microbiology* 2009; **75**: 7537–7541.
- 520   61.   Coil D, Jospin G, Darling AE. A5-miseq: an updated pipeline to assemble microbial  
521           genomes from Illumina MiSeq data. *Bioinformatics* 2015; **31**: 587–589.
- 522   62.   Parks DH, Imelfort M, Skennerton CT, Hugenholtz P, Tyson GW. CheckM: assessing the

- 523 quality of microbial genomes recovered from isolates, single cells, and metagenomes.  
524 *Genome Res* 2015; gr.186072.114.
- 525 63. Gurevich A, Saveliev V, Vyahhi N, Tesler G. QUILT: quality assessment tool for genome  
526 assemblies. *Bioinformatics* 2013; **29**: 1072–1075.
- 527 64. Seemann T. Prokka: rapid prokaryotic genome annotation. *Bioinformatics* 2014; **30**:  
528 2068–2069.
- 529 65. Chaumeil P-A, Mussig AJ, Hugenholtz P, Parks DH. GTDB-Tk: a toolkit to classify  
530 genomes with the Genome Taxonomy Database. *Bioinformatics* 2020; **36**: 1925–1927.
- 531 66. Arkin AP, Cottingham RW, Henry CS, Harris NL, Stevens RL, Maslov S, et al. KBase: The  
532 United States Department of Energy Systems Biology Knowledgebase. *Nature*  
533 *Biotechnology* 2018; **36**: 566–569.
- 534 67. Price MN, Dehal PS, Arkin AP. FastTree 2 – Approximately maximum-likelihood trees for  
535 large alignments. *PLoS ONE* 2010; **5**: e9490.
- 536 68. Stamatakis A. RAxML version 8: a tool for phylogenetic analysis and post-analysis of  
537 large phylogenies. *Bioinformatics* 2014; **30**: 1312–1313.
- 538 69. Edgar RC. MUSCLE: a multiple sequence alignment method with reduced time and  
539 space complexity. *BMC Bioinformatics* 2004; **5**: 113.
- 540 70. Ronquist F, Teslenko M, van der Mark P, Ayres DL, Darling A, Höhna S, et al. MrBayes  
541 3.2: efficient bayesian phylogenetic inference and model choice across a large model  
542 space. *Syst Biol* 2012; **61**: 539–542.
- 543 71. Ryu J-H, Kim S-H, Lee H-Y, Bai JY, Nam Y-D, Bae J-W, et al. Innate immune homeostasis  
544 by the homeobox gene *caudal* and commensal-gut mutualism in *Drosophila*. *Science*  
545 2008; **319**: 777–782.
- 546 72. Galac MR, Lazzaro BP. Comparative pathology of bacteria in the genus *Providencia* to a  
547 natural host, *Drosophila melanogaster*. *Microbes and Infection* 2011; **13**: 673–683.

- 548 73. Ding W, Baumdicker F, Neher RA. panX: pan-genome analysis and exploration. *Nucleic*  
549 *Acids Res* 2018; **46**: e5–e5.
- 550 74. Karunakaran R, Ebert K, Harvey S, Leonard ME, Ramachandran V, Poole PS. Thiamine  
551 is synthesized by a salvage pathway in *Rhizobium leguminosarum* bv. *viciae* strain 3841.  
552 *J Bacteriol* 2006; **188**: 6661–6668.
- 553 75. Gori A, Harrison OB, Mlia E, Nishihara Y, Chan JM, Msefula J, et al. Pan-GWAS of  
554 *Streptococcus agalactiae* highlights lineage-specific genes associated with virulence and  
555 niche adaptation. *mBio* 2020; **11**.
- 556 76. Jain C, Rodriguez-R LM, Phillippy AM, Konstantinidis KT, Aluru S. High throughput ANI  
557 analysis of 90K prokaryotic genomes reveals clear species boundaries. *Nature*  
558 *Communications* 2018; **9**: 5114.
- 559 77. Brouwer MSM, Roberts AP, Hussain H, Williams RJ, Allan E, Mullany P. Horizontal gene  
560 transfer converts non-toxigenic *Clostridium difficile* strains into toxin producers. *Nat*  
561 *Commun* 2013; **4**: 2601.
- 562 78. Van Rossum T, Ferretti P, Maistrenko OM, Bork P. Diversity within species: interpreting  
563 strains in microbiomes. *Nature Reviews Microbiology* 2020; 1–16.
- 564 79. Obadia B, Güvener ZT, Zhang V, Ceja-Navarro JA, Brodie EL, Ja WW, et al. Probabilistic  
565 invasion underlies natural gut microbiome stability. *Current Biology* 2017; **27**: 1999-  
566 2006.e8.
- 567 80. Douglas AE. The B vitamin nutrition of insects: the contributions of diet, microbiome and  
568 horizontally acquired genes. *Current Opinion in Insect Science* 2017; **23**: 65–69.
- 569 81. Pinto-Carbó M, Sieber S, Dessein S, Wicker T, Verstraete B, Gademann K, et al.  
570 Evidence of horizontal gene transfer between obligate leaf nodule symbionts. *The ISME*  
571 *Journal* 2016; **10**: 2092–2105.
- 572 82. Lopanik NB. Chemical defensive symbioses in the marine environment. *Functional*



- 573 *Ecology* 2014; **28**: 328–340.
- 574 83. Nikoh N, Hosokawa T, Moriyama M, Oshima K, Hattori M, Fukatsu T. Evolutionary origin  
575 of insect–*Wolbachia* nutritional mutualism. *PNAS* 2014; **111**: 10257–10262.
- 576 84. Driscoll TP, Verhoeve VI, Brockway C, Shrewsbury DL, Plumer ML, Sevdalis SE, et al.  
577 Evolution of *Wolbachia* mutualism and reproductive parasitism: insight from two novel  
578 strains that co-infect cat fleas. *bioRxiv* 2020; 2020.06.01.128066.
- 579 85. Smith TA, Driscoll T, Gillespie JJ, Raghavan R. A *Coxiella*-Like endosymbiont is a  
580 potential vitamin source for the lone star tick. *Genome Biol Evol* 2015; **7**: 831–838.
- 581 86. Smillie CS, Smith MB, Friedman J, Cordero OX, David LA, Alm EJ. Ecology drives a  
582 global network of gene exchange connecting the human microbiome. *Nature* 2011; **480**:  
583 241–244.
- 584 87. Brito IL, Yilmaz S, Huang K, Xu L, Jupiter SD, Jenkins AP, et al. Mobile genes in the  
585 human microbiome are structured from global to individual scales. *Nature* 2016; **535**:  
586 435–439.
- 587 88. Costliow ZA, Degnan PH. Thiamine acquisition strategies impact metabolism and  
588 competition in the gut microbe *Bacteroides thetaiotaomicron*. *mSystems* 2017; **2**.
- 589 89. Mansourian S, Enjin A, Jirle EV, Ramesh V, Rehmann G, Becher PG, et al. Wild African  
590 *Drosophila melanogaster* are seasonal specialists on marula fruit. *Current Biology* 2018;  
591 **28**: 3960-3968.e3.
- 592 90. Ross AC. Modern Nutrition in Health and Disease. 2014. Wolters Kluwer Health/Lippincott  
593 Williams & Wilkins.
- 594 91. Morris JJ. Black Queen evolution: the role of leakiness in structuring microbial  
595 communities. *Trends in Genetics* 2015; **31**: 475–482.
- 596 92. Bull JJ, Rice WR. Distinguishing mechanisms for the evolution of co-operation. *Journal of*  
597 *Theoretical Biology* 1991; **149**: 63–74.



- 598 93. Foster KR, Schluter J, Coyte KZ, Rakoff-Nahoum S. The evolution of the host microbiome  
599 as an ecosystem on a leash. *Nature* 2017; **548**: 43–51.
- 600 94. Waterworth SC, Flórez LV, Rees ER, Hertweck C, Kaltenpoth M, Kwan JC. Horizontal  
601 gene transfer to a defensive symbiont with a reduced genome in a multipartite beetle  
602 microbiome. *mBio* 2020; **11**.
- 603 95. Kiers ET, Rousseau RA, West SA, Denison RF. Host sanctions and the legume–  
604 rhizobium mutualism. *Nature* 2003; **425**: 78–81.
- 605 96. Kremer N, Philipp EER, Carpentier M-C, Brennan CA, Kraemer L, Altura MA, et al. Initial  
606 symbiont contact orchestrates host-organ-wide transcriptional changes that prime tissue  
607 colonization. *Cell Host & Microbe* 2013; **14**: 183–194.
- 608 97. Koehler S, Gaedeke R, Thompson C, Bongrand C, Visick KL, Ruby E, et al. The model  
609 squid–*Vibrio* symbiosis provides a window into the impact of strain- and species-level  
610 differences during the initial stages of symbiont engagement. *Environmental Microbiology*  
611 2019; **21**: 3269–3283.
- 612 98. Wendlandt CE, Regus JU, Gano-Cohen KA, Hollowell AC, Quides KW, Lyu JY, et al. Host  
613 investment into symbiosis varies among genotypes of the legume *Acmispon strigosus*,  
614 but host sanctions are uniform. *New Phytologist* 2019; **221**: 446–458.
- 615 99. Adair KL, Bost A, Bueno E, Kaunisto S, Kortet R, Peters-Schulze G, et al. Host  
616 determinants of among-species variation in microbiome composition in drosophilid flies.  
617 *ISME J* 2020; **14**: 217–229.
- 618 100. Voolstra CR, Ziegler M. Adapting with Microbial Help: Microbiome flexibility facilitates  
619 rapid responses to environmental change. *BioEssays* 2020; **42**: 2000004.

620

621

622 **Table 1** List of the ten genes that were most strongly associated with offspring number  
623 according to PA-association scores. All associations were confirmed by at least one of three  
624 methods from treeWAS [21].

| Gene Name | Annotation                                    | PA score | treeWAS terminal<br>p-value | treeWAS simultaneous<br>p-value | treeWAS subsequent<br>p-value |
|-----------|-----------------------------------------------|----------|-----------------------------|---------------------------------|-------------------------------|
|           | transposase                                   | 4.62     | 0.000009                    | 0.013                           | 0.003                         |
| ThiO      | putative thiamine biosynthesis oxidoreductase | 4.34     | 0.0002                      | 0.003                           | 0.02                          |
| ThiG      | thiazole synthase                             | 4.34     | 0.0002                      | 0.003                           | 0.02                          |
| ThiS      | thiamine biosynthesis protein                 | 4.34     | 0.0002                      | 0.003                           | 0.02                          |
| ThiC      | thiamine biosynthesis protein                 | 4.34     | 0.0002                      | 0.003                           | 0.02                          |
| ThiD      | phosphomethylpyrimidine kinase                | 4.34     | 0.0002                      | 0.003                           | 0.02                          |
|           | ferric iron siderophore receptor              | 4.21     | 0.000009                    | 0.11                            | 0.001                         |
|           | oxidoreductase                                | 4.21     | 0.000009                    | 0.11                            | 0.001                         |
|           | LysR family transcriptional regulator         | 4.21     | 0.000009                    | 0.11                            | 0.001                         |
|           | Methyltransferase domain protein              | 4.06     | 0.0003                      | 0.009                           | 0.89                          |

626

627

628

629

630

631

632

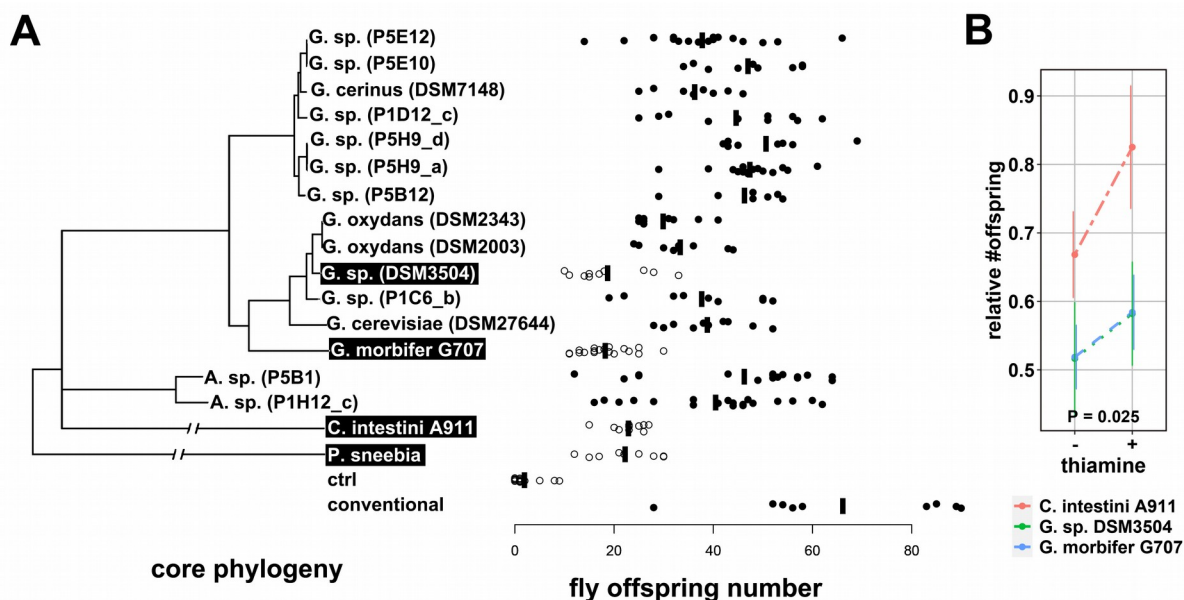

634 **Figure 1** (A) left: Bacterial tree based on 134 single-copy orthologs. Leaf labels of bacteria that  
635 do not carry a complete thiamine biosynthesis pathway are on black background. Right: Number  
636 of offspring produced by mono-associated CantonS females; vertical bars: median; ctrl: axenic  
637 flies; conventional: flies reinfected with lab microbiota. (B) The effect of thiamine treatment (x-  
638 axis) on the number of offspring in mono-associated females. Under thiamine treatment, the  
639 number of offspring increased for the strains that do not possess a complete thiamine  
640 biosynthesis pathway relative to strains that possess the complete pathway. P-value determined  
641 by linear mixed effects model. Error bars represent the standard error of the mean.

642

643

644

645

646

647

27

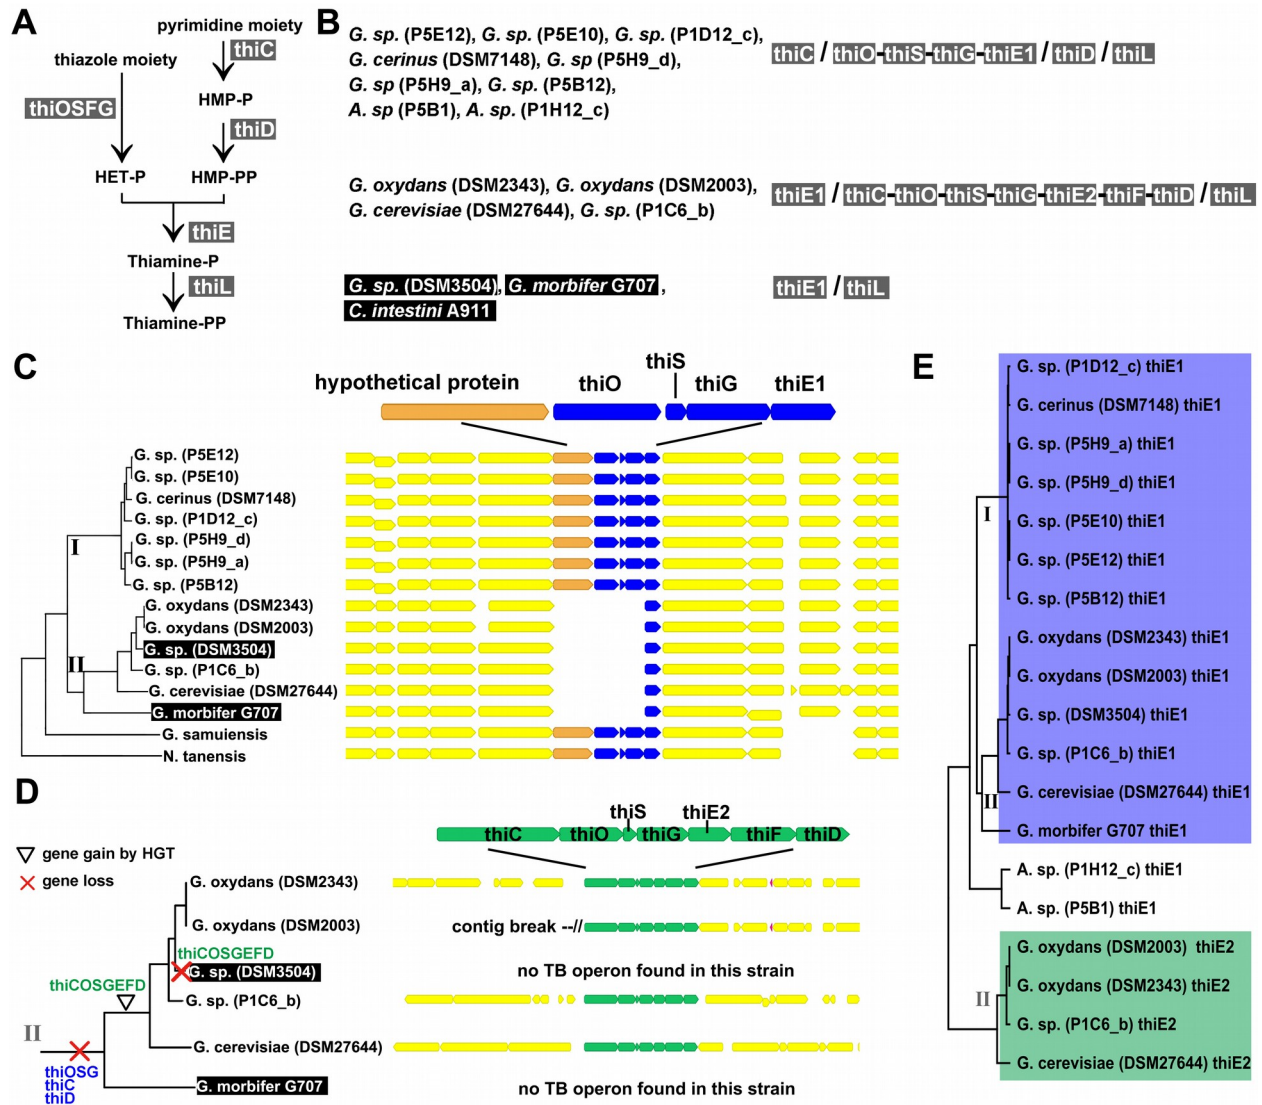

648 **Figure 2** (A) The thiamine biosynthesis pathway in acetic acid bacteria (B) Overview of thiamine  
 649 biosynthesis genes in the analyzed bacteria. Note that the function of thiF that appears to be  
 650 missing in the strains of the upper row can be replaced by the function of the homolog MoeB  
 651 (Rodionov et al., 2002) that we found in all strains analyzed. Genes forming an operon are  
 652 separated by a hyphen. Genes from different loci are separated by slashes. (C) Synteny of the  
 653 flanking regions of thiamine biosynthesis genes in *Gluconobacter*. thiOSG are missing on the *G.*  
 654 *morbifer* branch (II) at this locus. Thiamine biosynthesis genes are in blue. (D) right: The  
 655 complete pathway to synthesize Thiamine-P (green) forms an operon on the *G. morbifer* branch

656 (branch II); left: The phylogeny depicts the inferred evolutionary scenario on branch II. (E)  
657 Phylogeny of thiE. *G. oxydans* DSM2343, *G. oxydans* DSM2003, *G. sp.* P1C6\_b, *G. cerevisiae*  
658 DSM27644 have two copies of thiE, thiE1 (blue) and thiE2 (green). The phylogeny of thiE1 (blue  
659 background) is congruent with the core genome phylogeny. ThiE2 (green background) forms a  
660 distinct clade that is more distant than thiE from *Acetobacter*, indicating HGT from a distant  
661 clade.
